# Supplementary material for: Retrospective Screening of Anthrax-like Disease Induced by Bacillus tropicus str. JMT from Chinese Soft-Shell Turtles in Taiwan
Source: MDPI journal article supplement (doi:10.3390/pathogens12050693), 2023-05-10
Supplement: s1 [file s1]

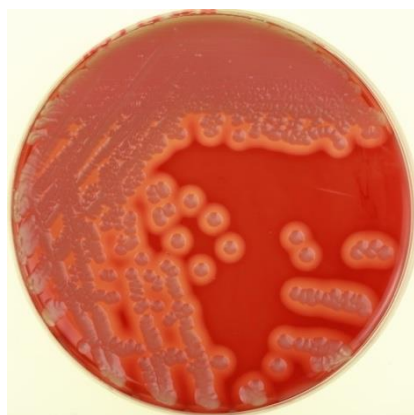

(a)

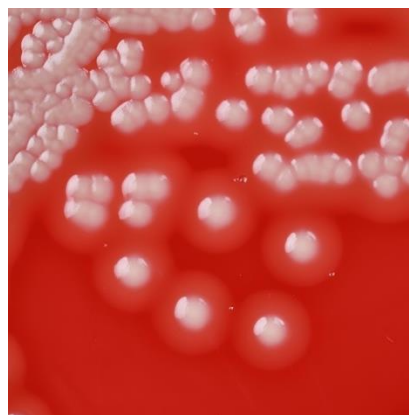

(b)

**Figure S1. The colony morphology of *Bacillus tropicus* JMT.** The colony on the plate shows white-grey color with a double zone of  $\beta$ -hemolysis in the absence of the rhizoid growth.

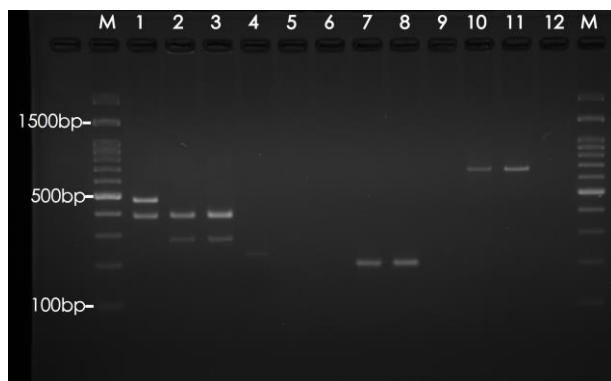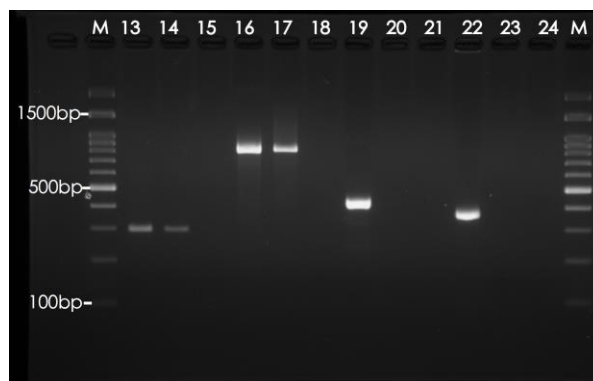

**Figure S2. Gels of PCR assays in this study.** Using multiplex PCR assays for discriminating among *B. cereus* ATCC 14579 (Lane 1), *B. thuringiensis* ATCC 10792 (Lane 2) and *Bacillus* spp. JMT (Lane 3), the former two were used as control. The expected 400-bp and 299-bp products were obtained together for *Bacillus* spp. JMT with a multiplex PCR primer set targeting *groEL*, and *gyrB* genes, respectively.

XRE1/XRE2 primer set was used for identifying *B. thuringiensis* (Lane 4, 5 and 6). *B. thuringiensis* ATCC 10792 (Lane 4) and *B. cereus* ATCC 14579 (Lane 6) were as positive and negative control, respectively. *Bacillus* spp. JMT (Lane 5) was PCR-negative in targeting XRE. *Bacillus* spp. JMT (Lane 8, 11, 14, 17, 20, and 23) were screened by PCR for virulence genes using specific JM $bpsB208f$ /JM $bpsB208r$  (Lane 7, 8 and 9), JM $hasA700f$ /JM $hasA700r$  (Lane 10, 11 and 12) JM $pagA318f$ /JM $pagA318r$  (Lane 13, 14 and 15), JM $cya882f$ /JM $cya882r$  (Lane 16, 17 and 18), JM $lef436f$ /JM $lef436r$  (Lane 19, 20, 21), and  $lef3/lef4$  (Lane 22, 23, 24) primer sets. Lanes 7, 10, 13, 16, 19, and 22 were the positive control, composed of 4 amplicons amplified from each 20ng vector with cloned partial *bpsB*, *hasA*, *pagA*, *cya*, *lef* genes, separately. As well as, *B. cereus* ATCC 14579 was served as the negative control (Lane 9, 12, 15, 18, 21 and 24). 100bp DNA ladder as the marker (Lane M) were shown on both sides of the gel.

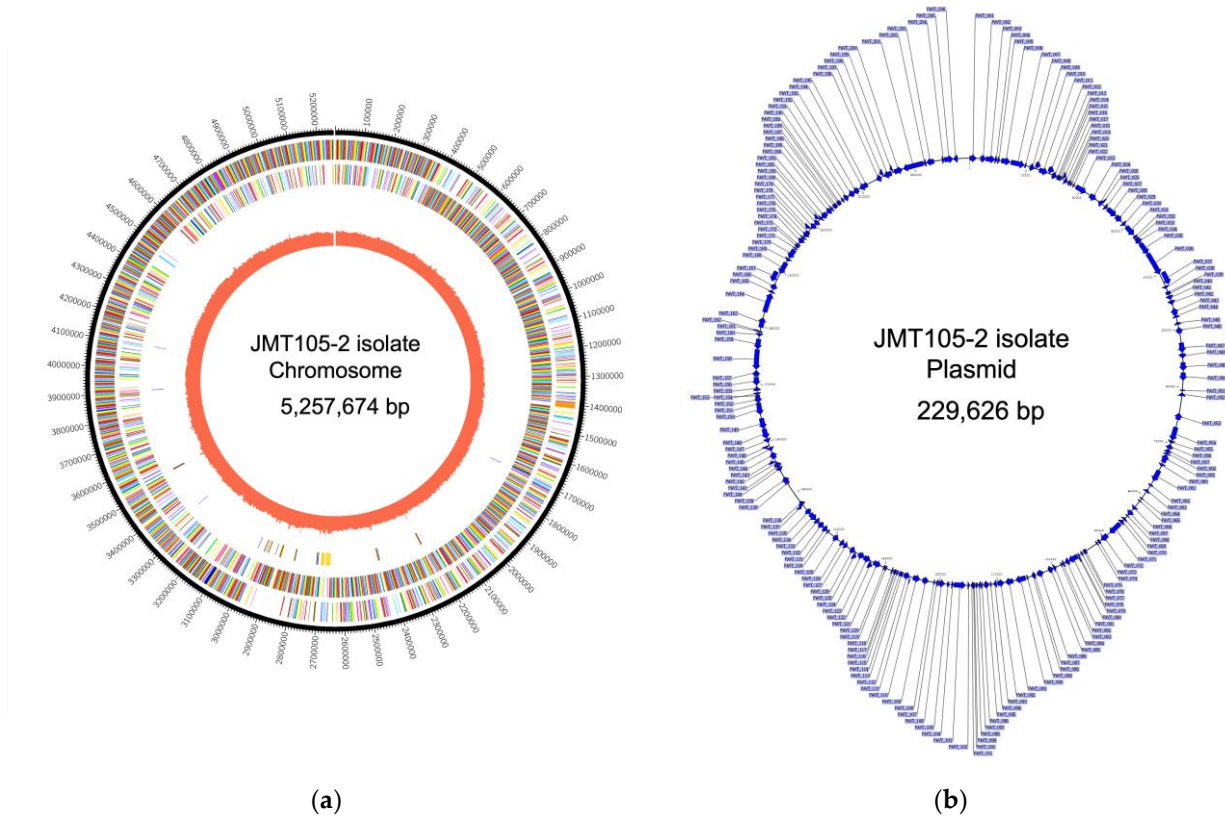

**Figure S3. Genome map of *B. tropicus* JMT105-2 isolate contains a chromosome and a plasmid.**
